# Supplementary material for: One Risk Assessment Tool for Cardiovascular Disease, Type 2 Diabetes, and Chronic Kidney Disease
Source: Oxford University Press journal article supplement (doi:10.2337/dc11-1417), 2012-02-16
Supplement: dc111417supplementarydata.pdf [file dc111417supplementarydata.pdf]

SUPPLEMENTARY DATA

**Supplementary Table 1.** Percentage of the population by risk score category and age category \*

| Score category | Age category (years) |         |         |         |         |         |         |         |
|----------------|----------------------|---------|---------|---------|---------|---------|---------|---------|
|                | < 45                 | 45-49.9 | 50-54.9 | 55-59.9 | 60-64.9 | 65-69.9 | 70-74.9 | 75-85.9 |
| <b>Males</b>   |                      |         |         |         |         |         |         |         |
| < 25           | 98.4                 | 72.2    | 47.7    | 15.5    | -       | -       | -       | -       |
| 25 – 29 †      | 1.6                  | 18.2    | 25.2    | 29.3    | -       | -       | -       | -       |
| 30 – 34        | -                    | 5.1     | 19.8    | 21.7    | 12.2    | -       | -       | -       |
| 35 – 39        | -                    | 2.8     | 4.5     | 23.0    | 20.2    | 14.2    | -       | -       |
| 40 – 44        | -                    | 0.6     | 2.7     | 4.4     | 28.6    | 25.5    | -       | -       |
| 45 – 49        | -                    | 1.1     | -       | 5.3     | 20.6    | 21.4    | 15.8    | -       |
| 50 - 54        | -                    | -       | -       | 0.7     | 10.3    | 25.3    | 32.6    | -       |
| 55 - 59        | -                    | -       | -       | 0.2     | 5.1     | 7.7     | 19.7    | -       |
| ≥ 60           | -                    | -       | -       | -       | 2.9     | 5.8     | 31.9    | 100     |
| <b>Females</b> |                      |         |         |         |         |         |         |         |
| < 25           | 97.6                 | 75.6    | 40.6    | 8.7     | -       | -       | -       | -       |
| 25 – 29 †      | 1.8                  | 13.0    | 30.9    | 23.7    | 8.0     | -       | -       | -       |
| 30 – 34        | 0.4                  | 7.3     | 13.3    | 22.8    | 11.7    | -       | -       | -       |
| 35 – 39        | 0.2                  | 2.6     | 6.1     | 19.7    | 26.5    | 10.5    | -       | -       |
| 40 – 44        | -                    | 1.6     | 7.3     | 13.8    | 20.5    | 17.0    | -       | -       |
| 45 – 49        | -                    | -       | 1.8     | 7.8     | 13.3    | 20.4    | 5.0     | -       |
| 50 - 54        | -                    | -       | -       | 2.3     | 13.9    | 23.6    | 9.5     | -       |
| 55 - 59        | -                    | -       | -       | 1.2     | 4.1     | 12.6    | 28.2    | -       |
| ≥ 60           | -                    | -       | -       | -       | 2.0     | 15.9    | 57.4    | 100     |

\* Data from the Rotterdam Study and PREVEND were used for this Table. Hoorn Study data were excluded because the selection on abnormal glucose tolerance may impact on positive predictive value

† Categories are up to and including the latter score
